# Supplementary material
Source: publisher site journal article supplement (https://www.dovepress.com/get_supplementary_file.php?f=313613.docx)
Supplement: Supplementary file 1 [file get_supplementary_file.php]

**Supplementary Table 1. Extension of the quantitative bias model to obtain a bias-adjusted hazard ratio for the association between exposure to dibutyl phthalate (DBP) and incident estrogen receptor (ER)-positive breast cancer after accounting for the estimated magnitude of bias due to unmeasured confounding by medications contributing to DBP.**

| **Medication Exposures Contributing to DBP Exposure (Ci)[[1]](#footnote-1)** |  | **Quantitative Bias Analysis for the “Unmeasured” Confounder Ci [[2]](#footnote-3)** | | |
| --- | --- | --- | --- | --- |
|  | **[[3]](#footnote-5)** |
| Bisacodyl | 2.13 | 1.00 | 2.13 |
| Budesonide | 2.13 | 1.00 | 2.13 |
| Diclofenac | 2.12 | 1.00 | 2.12 |
| Diclofenac, combinations | 2.12 | 1.00 | 2.12 |
| Lithium | 2.02 | 1.00 | 2.02 |
| Mesalamine | 2.04 | 1.01 | 2.03 |
| Multi-enzyme | 2.12 | 1.00 | 2.12 |

1. Dichotomous. Classified on the basis of the fifth level of the ATC code. [↑](#footnote-ref-1)
2. Lash TL, Fink AK, Fox MP. Unmeasured and unknown confounders. In: Applying Quantitative Bias Analysis to Epidemiologic Data. Springer; 2009:59–78. [↑](#footnote-ref-3)
3. The estimated hazard ratio bias-adjusted for unmeasured confounding by Ci, obtained by applying the estimated magnitude of bias due to confounding by Ci to the expected observed hazard ratio. [↑](#footnote-ref-5)
